# Supplementary material
Source: Springer Nature journal article supplement (https://www.springermedizin.de/resource/supplementary/12985_2010_1090_MOESM4_ESM.pdf/9609118)

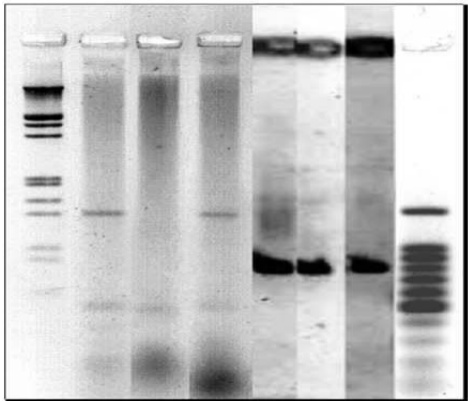

1

2

3

4

5

6

7

8

Supplement: MOESM4 [file 9609118]
